# Supplementary material for: Catalytic addition of amines to carbodiimides by bis(β-diketiminate)lanthanide(ii) complexes and mechanistic studies
Source: Royal Society of Chemistry journal article supplement (doi:10.1039/c5dt03674g), 2015-01-01
Supplement: c5dt03674g1.pdf [file c5dt03674g1.pdf]

Supporting Information

## **Catalytic addition of amines to carbodiimides by**

### **bis( $\beta$ -diketimate)lanthanide(II) complexes and mechanistic studies**

Mingqiang Xue,\* Yu Zheng, Yubiao Hong, Yingming Yao, Fan Xu,\* Yong Zhang,  
and Qi Shen

*\*Correspondence to: Mingqiang Xue, College of Chemistry, Chemical Engineering and Materials Science, Soochow University, Suzhou 215123, People's Republic of China. E-mail: xuemingqiang@suda.edu.cn*

## **Supporting material**

All manipulations and reactions were performed under a purified argon atmosphere using standard Schlenk techniques. Solvents were degassed and distilled from sodium benzophenone ketyl under argon prior to use. The IR spectra were recorded on a Magna-IR 550 spectrometer. Melting points were determined in sealed Ar-filled capillary tube, and uncorrected.  $^1\text{H}$  NMR and  $^{13}\text{C}$  NMR spectra were recorded on a Unity Inova-400 spectrometer. Chemical shifts ( $\delta$ ) were reported in ppm. Lanthanide analyses were performed by EDTA titration with a xylenol orange indicator and a hexamine buffer. Elemental analyses were performed by direct combustion using a Carlo-Erba EA 1110 instrument.

**General Procedure for the Reaction of Amines with Carbodiimides Catalyzed by Complex 5 (Table 3, Entry 2 as an example).**

A 10 mL Schlenk tube under dried argon was charged with **5** (0.0082 g, 0.01 mmol). To the flask were added the aniline (PhNH<sub>2</sub>) (0.182 mL, 10.96 M, 2.00 mmol), *N,N'*-diisopropylcarbodiimide (*i*PrNCN*i*Pr) (0.312 mL, 6.418 M, 2.00 mmol). The resulting mixture was stirred at 60 °C for 8 min. After the reaction was completed, the reaction mixture was hydrolyzed by water (2 mL), extracted with dichloromethane (3×10 mL), dried over anhydrous Na<sub>2</sub>SO<sub>4</sub>, and filtered. Then the solvent was removed under reduced pressure, and the final products were further purified by crystallization from *n*-hexane to give the colorless solid **12** (0.4343 g, 99% yield).

### Spectroscopic data for the addition products of amines to carbodiimides

#### Analytical data:

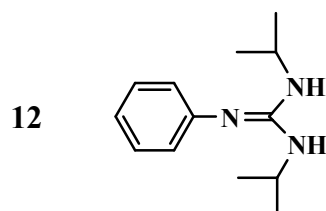

<sup>1</sup>H NMR (400 MHz, CDCl<sub>3</sub>): δ = 7.22 (m, 2H; C<sub>6</sub>H<sub>5</sub>), 6.93 (m, 1H; C<sub>6</sub>H<sub>5</sub>), 6.85 (d, *J* = 7.6 Hz, 2H; C<sub>6</sub>H<sub>5</sub>), 3.77 (br, 2H; NH), 3.61 (m, 2H; CH(CH<sub>3</sub>)<sub>2</sub>), 1.17 (d, *J* = 6.4 Hz, 12H; CH(CH<sub>3</sub>)<sub>2</sub>); <sup>13</sup>C NMR (100 MHz, CDCl<sub>3</sub>): δ = 150.5, 150.4, 129.4, 123.7, 121.5, 43.6, 23.6.

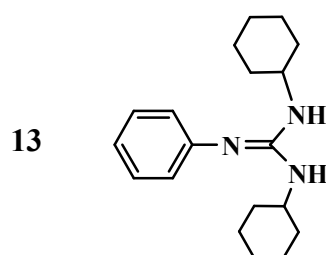

<sup>1</sup>H NMR (400 MHz, CDCl<sub>3</sub>): δ = 7.25 (m, 2H; C<sub>6</sub>H<sub>5</sub>), 6.93 (m, 1H; C<sub>6</sub>H<sub>5</sub>), 6.86 (d, *J* = 8.0 Hz, 2H; C<sub>6</sub>H<sub>5</sub>), 3.64 (br, 2H; NH), 3.42 (m, 2H; NHCy), 2.03 – 1.05 (m, 20H; Cy); <sup>13</sup>C NMR (100 MHz, CDCl<sub>3</sub>): δ = 150.7, 150.7, 129.5, 123.9, 121.6, 50.5, 34.1, 26.0, 25.2.

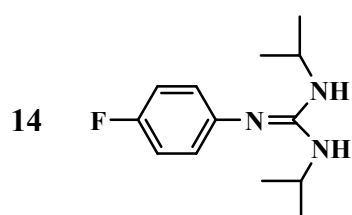

M.p.: 130–131 °C. <sup>1</sup>H NMR (400 MHz, CDCl<sub>3</sub>): δ = 6.93(m, 2H; C<sub>6</sub>H<sub>4</sub>), 6.76 (m, 2H; C<sub>6</sub>H<sub>4</sub>), 3.76 (br, 2H; NH), 3.52 (m, 2H; CH(CH<sub>3</sub>)<sub>2</sub>), 1.15 (d, *J* = 6.0 Hz, 12H; CH(CH<sub>3</sub>)<sub>2</sub>); <sup>13</sup>C NMR (100 MHz, CDCl<sub>3</sub>): δ = 148.0, 144.6, 141.8, 123.4, 122.5, 28.3, 24.2.

15 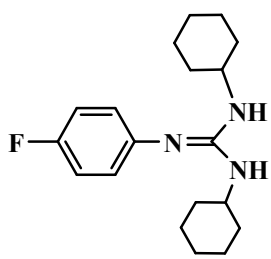 M.p.: 168-169 °C. <sup>1</sup>H NMR (400 MHz, CDCl<sub>3</sub>): δ = 6.92 (m, 2 H; C<sub>6</sub>H<sub>4</sub>), 6.76 (m, 2 H; C<sub>6</sub>H<sub>4</sub>), 3.59 (br, 2 H; NH), 3.38 (m, 2 H; NHCy), 1.99 – 1.03 (m, 20 H; Cy); <sup>13</sup>C NMR (100 MHz, CDCl<sub>3</sub>): δ = 150.6, 124.9, 124.8, 116.1, 115.9, 50.4, 34.1, 25.9, 25.2.

16 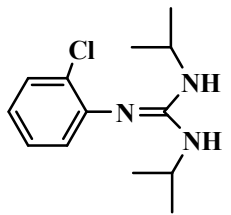 M.p.: 137–138 °C. <sup>1</sup>H NMR (400 MHz, CDCl<sub>3</sub>): δ = 7.34 (d, *J* = 8.0 Hz, 1 H; C<sub>6</sub>H<sub>4</sub>), 7.13 (m, 1 H; C<sub>6</sub>H<sub>4</sub>), 6.87 (m, 2 H; C<sub>6</sub>H<sub>4</sub>), 3.78 (br, 2 H; NH), 3.48 (m, 2 H; CH), 1.18 (m, 12 H) (CH<sub>3</sub>); <sup>13</sup>C NMR (100 MHz, CDCl<sub>3</sub>): δ = 150.1, 147.2, 130.1, 128.5, 127.8, 125.5, 122.7, 43.6, 23.6.

17 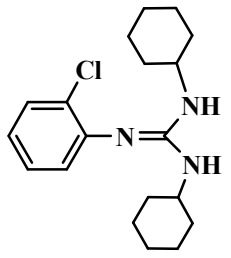 M.p.: 137–138 °C. <sup>1</sup>H NMR (400 MHz, CDCl<sub>3</sub>): δ = 7.34-7.33 (d, *J* = 7.6 Hz, 1 H; C<sub>6</sub>H<sub>4</sub>), 7.15-7.11 (m, 1 H; C<sub>6</sub>H<sub>4</sub>), 6.92-6.85 (m, 2 H; C<sub>6</sub>H<sub>4</sub>), 3.55 (br, 2 H; NH), 3.42 (m, 2 H; NHCy), 2.05-1.06 (m, 20 H; Cy); <sup>13</sup>C NMR (100 MHz, CDCl<sub>3</sub>): δ = 150.1, 147.6, 130.1, 128.7, 127.8, 125.6, 122.6, 50.5, 34.1, 26.0, 25.2.

18 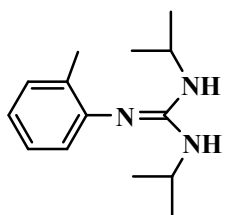 M.p.: 124–125 °C. <sup>1</sup>H NMR (400 MHz, CDCl<sub>3</sub>): δ = 7.15 (m, 1 H; C<sub>6</sub>H<sub>4</sub>), 7.08 (d, *J* = 7.6 Hz, 1 H; C<sub>6</sub>H<sub>4</sub>), 6.90-6.86 (m, 1 H; C<sub>6</sub>H<sub>4</sub>), 6.78 (d, *J* = 7.2 Hz, 1 H; C<sub>6</sub>H<sub>4</sub>), 3.76 (br, 2 H; NH), 3.46 (br 2 H; CH), 2.14 (m, 3 H; ArCH<sub>3</sub>), 1.17-1.15 (m, 12 H; CH<sub>3</sub>); <sup>13</sup>C NMR (100 MHz, CDCl<sub>3</sub>): δ = 149.1, 148.6, 131.8, 130.6, 126.9, 123.4, 121.9, 43.4, 23.7, 18.4.

19 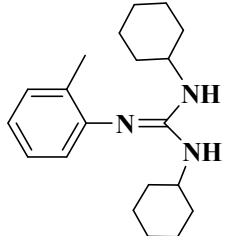 <sup>1</sup>H NMR (400 MHz, CDCl<sub>3</sub>): 6.95-6.91 (m, 2H; C<sub>6</sub>H<sub>4</sub>), 6.80-6.76 (m, 2H; C<sub>6</sub>H<sub>4</sub>), 3.62 (br, 2H; NH), 3.40 (br, 2H; NHCy), 2.00 (m, 3H; CH<sub>3</sub>), 1.97-1.03 (m, 20 H; Cy); <sup>13</sup>C NMR (100 MHz, CDCl<sub>3</sub>): 148.9, 148.7, 131.9, 130.6, 126.8, 123.5, 121.9, 50.4, 34.2, 25.9, 25.2, 18.4.

20 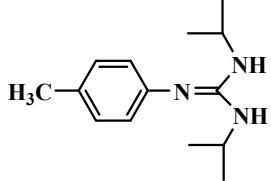 M.p.: 155-156 °C. <sup>1</sup>H NMR (400 MHz, CDCl<sub>3</sub>): δ = 7.03 (d, *J* = 8.0 Hz, 2 H; C<sub>6</sub>H<sub>4</sub>), 6.72 (d, *J* = 7.6 Hz, 2 H; C<sub>6</sub>H<sub>4</sub>), 3.73 (br, 2 H; NH), 3.53 (m, 2 H; CH), 2.26 (s, 3 H; ArCH<sub>3</sub>), 1.14-1.12 (m,

- 12 H;  $CH_3$ );  $^{13}C$  NMR (100 MHz,  $CDCl_3$ ):  $\delta = 150.6, 147.6, 130.7, 130.1, 123.5, 43.4, 23.6, 21.0$ .
- 21 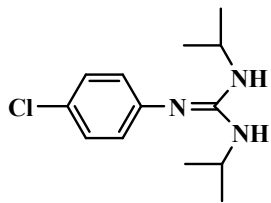  $^1H$  NMR (400 MHz,  $CDCl_3$ ):  $\delta = 7.21$  (d,  $J = 8.4$  Hz, 2 H;  $C_6H_4$ ), 6.80 (d,  $J = 8.8$  Hz, 2 H;  $C_6H_4$ ), 3.75 (br, 2 H; NH), 3.61 (br, 2 H; CH), 1.17-1.16 (m, 12 H;  $CH_3$ );  $^{13}C$  NMR (100 MHz,  $CDCl_3$ ):  $\delta = 150.5, 149.2, 129.4, 126.4, 125.1, 43.5, 23.6$ .
- 22   $^1H$  NMR ( $CDCl_3$ ):  $\delta = 7.40$  (m, 2H;  $C_6H_4$ ), 6.89 (d,  $J = 8.4$  Hz, 2H;  $C_6H_4$ ), 3.74 (m, 2H; CH), 1.20-1.18 (m, 12H;  $CH_3$ );  $^{13}C$  NMR (100 MHz,  $CDCl_3$ ):  $\delta = 150.4, 149.7, 132.4, 125.6, 114.0, 43.5, 23.6$ .
- 23   $^1H$  NMR (400 MHz,  $CDCl_3$ ):  $\delta = 6.84$  (s, 4 H;  $C_6H_4$ ), 3.77 (m, 7 H;  $OCH_3$  and CH), 1.18-1.17 (m, 12 H;  $CH_3$ );  $^{13}C$  NMR (100 MHz,  $CDCl_3$ ):  $\delta = 154.6, 150.8, 142.7, 124.2, 114.6, 55.4, 43.3, 23.3$ .
- 24   $^1H$  NMR ( $CDCl_3$ ):  $\delta = 7.40$  (d,  $J = 12.0$  Hz, 2H;  $C_6H_4$ ), 6.87 (d,  $J = 8.0$  Hz, 2H;  $C_6H_4$ ), 3.79 (s, 2H; CH), 1.19 (s, 12H;  $CH_3$ );  $^{13}C$  NMR (100 MHz,  $CDCl_3$ ):  $\delta = 158.4, 150.5, 141.0, 125.7, 122.9, 43.5, 23.3$ .
- 25   $^1H$  NMR (400 MHz,  $CDCl_3$ ):  $\delta = 8.08$  (d,  $J = 8.0$  Hz, 1H;  $C_{10}H_7$ ), 7.78 (d,  $J = 7.6$  Hz, 1H;  $C_{10}H_7$ ), 7.45 (m, 4H;  $C_{10}H_7$ ), 6.91 (d,  $J = 7.2$  Hz, 1H;  $C_{10}H_7$ ), 3.88 (br, 2H; NH), 3.63 (m, 2 H; CH), 1.18 (m, 12H;  $CH_3$ );  $^{13}C$  NMR (100 MHz,  $CDCl_3$ ):  $\delta = 150.2, 147.1, 135.1, 129.9, 128.1, 126.8, 126.1, 125.0, 124.7, 121.7, 118.1, 43.6, 23.7$ .
- 26   $^1H$  NMR (400 MHz,  $CDCl_3$ ):  $\delta = 7.07$  (d,  $J = 7.2$  Hz, 2H;  $C_6H_3$ ), 6.98-6.94 (m, 1H;  $C_6H_3$ ), 4.19 (br, 2H; NH), 3.43-3.19 (m, 2H; ArCH), 3.11-3.04 (m, 2 H; CH), 1.25-1.04 (m, 24 H;  $CH_3$ );  $^{13}C$  NMR (100 MHz,  $CDCl_3$ ):  $\delta = 147.7, 144.3, 141.6, 123.2, 122.3, 43.5, 42.7, 28.0, 23.9$ .

- 27 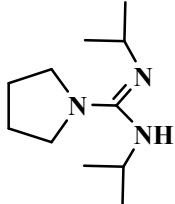  $^1\text{H NMR}$  (400 MHz,  $\text{CDCl}_3$ ):  $\delta = 3.38$  (s, 2H; CH), 3.26(m, 4 H;  $\alpha\text{-CH}_2$ ), 1.80 (s, 4 H;  $\beta\text{-CH}_2$ ), 1.11 (m, 12 H;  $\text{CH}_3$ );  $^{13}\text{C NMR}$  (100 MHz,  $\text{CDCl}_3$ ):  $\delta = 153.7, 47.9, 43.6, 26.3, 24.8$ .
- 28   $^1\text{H NMR}$  (400 MHz,  $\text{CDCl}_3$ ):  $\delta = 3.36$  (m, 2 H; CH), 3.04 (br, 4 H;  $\text{CH}_2$ ), 1.52 (br, 6 H;  $\text{CH}_2$ ), 1.09 (m, 12 H;  $\text{CH}_3$ );  $^{13}\text{C NMR}$  (100 MHz,  $\text{CDCl}_3$ ):  $\delta = 156.7, 49.1, 46.6, 26.0, 24.9, 24.0$ .
- 29   $^1\text{H NMR}$  (400 MHz,  $\text{CDCl}_3$ ):  $\delta = 7.09\text{-}7.04$  (m, 3H;  $\text{C}_6\text{H}_3$ ), 3.21-3.09 (m, 2H; NH), 3.56(m, 2H; CH), 2.64 (s, 6H;  $\text{ArCH}_3$ ), 1.12-1.08 (m, 24 H;  $\text{CH}_3$ );  $^{13}\text{C NMR}$  (100 MHz,  $\text{CDCl}_3$ ):  $\delta = 148.7, 144.3, 141.5, 123.3, 122.4, 42.6, 28.0, 23.9$ .
- 30   $^1\text{H NMR}$  (400 MHz,  $\text{CDCl}_3$ ):  $\delta = 6.80$  (s, 2H;  $\text{C}_6\text{H}_3$ ), 2.22 (s, 2H; NH), 2.06 (s, 7H;  $\text{ArCH}_3$ ), 1.15-1.10 (br, 14 H;  $\text{CH}_3$ );  $^{13}\text{C NMR}$  (100 MHz,  $\text{CDCl}_3$ ):  $\delta = 148.0, 143.7, 130.7, 130.5, 128.6, 77.3, 23.7, 20.8, 18.2$ .

## References

- [1] T. G. Ong, G. P. A. Yap and D. S. Richeson, *J. Am. Chem. Soc.* **2003**, *125*, 8100.
- [2] A. R. Katritzky, N. M. Khashab and S. Bobrov, *Helv. Chim. Acta.* **2005**, *88*, 1664.
- [3] X. M. Zhang, C. Y. Wang, C. W. Qian, F. B. Han, F. Xu and Q. Shen, *Tetrahedron* **2011**, *67*, 8790.
- [4] Q. H. Li, S. W. Wang, S. L. Zhou, G. S. Yang, X. C. Zhu and Y. Y. Liu, *J. Org. Chem.* **2007**, *72*, 6763.
- [5] E. W. Thomas, E. E. Nishizawa, D. C. Zimmermann and D. J. Williams, *J. Med. Chem.* **1989**, *32*, 228.

Table S1. Crystallographic data (unit cell) for complexes **1-3** and **5**

|                            | <b>1</b>    | <b>2</b>    | <b>3</b>    | <b>5</b>    |
|----------------------------|-------------|-------------|-------------|-------------|
| <i>a</i> (Å)               | 11.2725(13) | 11.5227(15) | 12.4327(8)  | 10.9466(15) |
| <i>b</i> (Å)               | 20.602(2)   | 19.681(3)   | 19.2691(12) | 11.5259(16) |
| <i>c</i> (Å)               | 19.583(2)   | 20.917(3)   | 24.7480(16) | 19.195(2)   |
| $\alpha$ (deg)             | 90          | 90          | 90          | 101.515(2)  |
| $\beta$ (deg)              | 91.485(3)   | 90          | 90          | 96.956(2)   |
| $\gamma$ (deg)             | 90          | 90          | 90          | 115.923(2)  |
| <i>V</i> (Å <sup>3</sup> ) | 4546.4(9)   | 4743.5(12)  | 5928.8(7)   | 2073.8(5)   |
